# Supplementary material for: Correlation of skin rash and overall survival in patients with pancreatic cancer treated with gemcitabine and erlotinib – results from a non-interventional multi-center study
Source: PubMed Central journal article supplement (PMC7041266; doi:10.1186/s12885-020-6636-7), 2020-02-24

### Product-Limit Survival Estimates

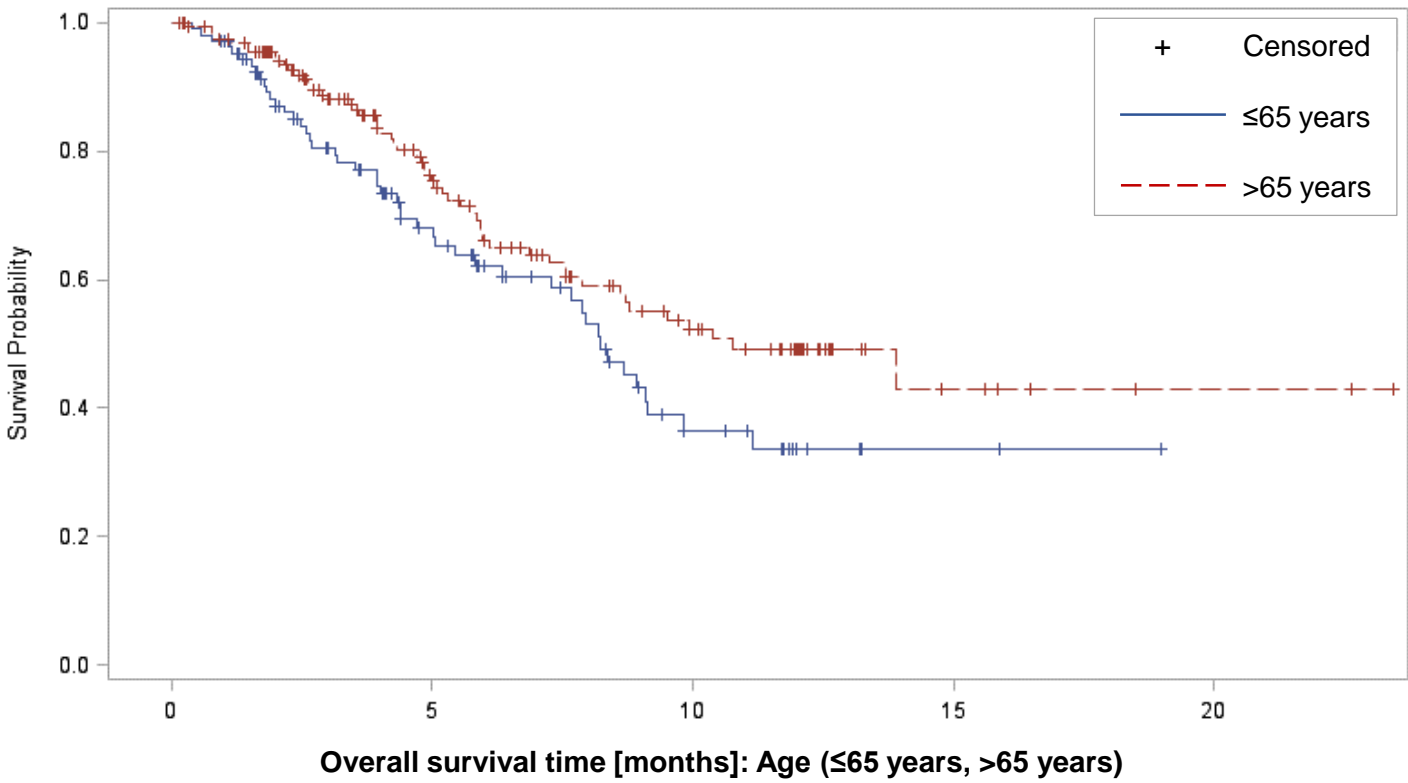

Supplement: 12885_2020_6636_MOESM2_ESM.pdf [file 12885_2020_6636_MOESM2_ESM.pdf]
